# Supplementary material for: Processing Optimization and Toxicological Evaluation of “Lead-Free” Piezoceramics: A KNN-Based Case Study
Source: MDPI journal article supplement (doi:10.3390/ma14154337), 2021-08-03
Supplement: s1 [file s1]

# Supplementary materials

## Processing optimization and toxicological evaluation of “lead-free” piezoceramics: a KNN-based case study

Antonio Iacomini<sup>1\*</sup>, Juan A. Tamayo Ramos<sup>2</sup>, Carlos Rumbo<sup>2</sup>, Irem Urgan<sup>2,3</sup>, Marzia Mureddu<sup>1</sup>, Gabriele Mulas<sup>1</sup>, Stefano Enzo<sup>1</sup>, Sebastiano Garroni<sup>1\*</sup>

<sup>1</sup>Department of Chemistry and Pharmacy, University of Sassari and INSTM, Via Vienna 2, I-07100 Sassari, Italy; aiacomini@uniss.it, m.mureddu6@studenti.uniss.it, mulas@uniss.it, enzo@uniss.it, sgarro-ni@uniss.it

<sup>2</sup>International Research Centre in Critical Raw Materials-ICCRAM, Universidad de Burgos, Plaza Misael Bañuelos S/n, 09001, Burgos, Spain; crumbo@ubu.es, jatramos@ubu.es, iremurgen93@gmail.com

<sup>3</sup>Department of Metallurgical and Materials Engineering, Eskisehir Osmangazi University, Meselik Campus 26480, Eskisehir, Turkey.

\* Correspondence: aiacomini@uniss.it; sgarroni@uniss.it; Tel.: +39 079 229558

### 1. Synthesis of MN

The X-ray pattern of  $\text{MgNb}_2\text{O}_6$  (MN) synthesized by solid-state method is shown in **Figure S1**.

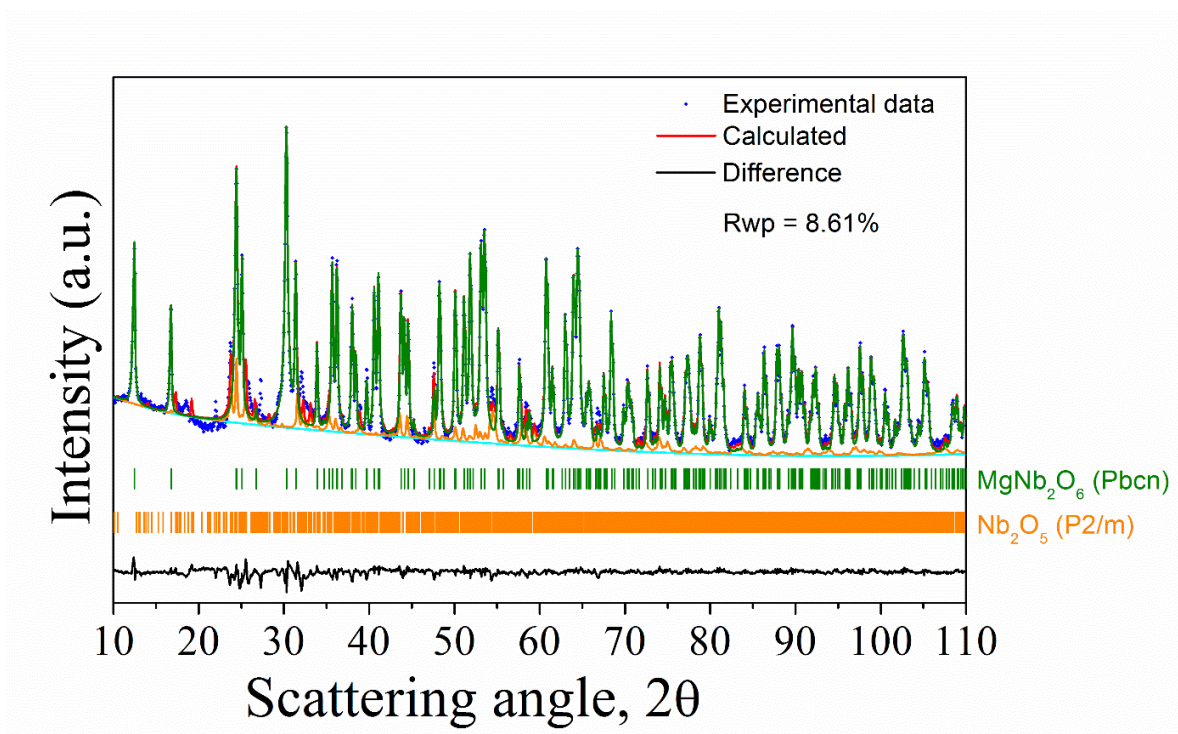

**Figure S1.** XRD pattern and Rietveld analysis of  $\text{MgNb}_2\text{O}_6$ .

A columbite-like phase  $\text{MgNb}_2\text{O}_6$  (MN) with orthorhombic structure (s.g. Pbcn) was obtained; traces of unreacted niobium pentoxide (below 4%) was also detected.
